# Supplementary material
Source: PubMed Central journal article supplement (PMC11009857)
Supplement: NIHMS1962556-supplement-SD_Fig2.pdf [file NIHMS1962556-supplement-SD_Fig2.pdf]

| Y-27632  | CloneR   | CEPT     |
|----------|----------|----------|
| 0.879829 | 0.79054  | 0.732178 |
| 0.879784 | 0.794805 | 0.744594 |
| 0.877204 | 0.791349 | 0.742123 |
| 0.873127 | 0.794442 | 0.745163 |
| 0.876657 | 0.795473 | 0.739039 |
| 0.883738 | 0.788747 | 0.750492 |
| 0.872486 | 0.792683 | 0.753765 |
| 0.867465 | 0.789243 | 0.748845 |
| 0.870345 | 0.781505 | 0.750922 |
| 0.86637  | 0.770958 | 0.76462  |
| 0.87754  | 0.786684 | 0.769782 |
| 0.873247 | 0.782367 | 0.770138 |
| 0.876373 | 0.787574 | 0.765652 |
| 0.875421 | 0.783838 | 0.767533 |
| 0.88309  | 0.814324 | 0.765502 |
| 0.878786 | 0.815211 | 0.77011  |
| 0.870839 | 0.827776 | 0.760971 |
| 0.877999 | 0.845003 | 0.764199 |
| 0.869253 | 0.844096 | 0.762025 |
| 0.888661 | 0.842024 | 0.76579  |
| 0.893405 | 0.859727 | 0.770259 |
| 0.885583 | 0.862659 | 0.776615 |
| 0.885989 | 0.8769   | 0.768225 |
| 0.899503 | 0.872552 | 0.774261 |
| 0.899217 | 0.887307 | 0.783436 |
| 0.897151 | 0.885819 | 0.783401 |
| 0.920739 | 0.89184  | 0.783191 |
| 0.909914 | 0.89252  | 0.78942  |
| 0.911864 | 0.887515 | 0.799926 |
| 0.916798 | 0.894691 | 0.807045 |
| 0.796859 | 0.91448  | 0.794896 |
| 0.79747  | 0.913342 | 0.80177  |
| 0.791194 | 0.91231  | 0.813689 |
| 0.796221 | 0.91231  | 0.808755 |
| 0.795106 | 0.920693 | 0.818657 |
| 0.79027  | 0.914773 | 0.818025 |
| 0.788432 | 0.920208 | 0.836174 |
| 0.789598 | 0.918357 | 0.844842 |
| 0.791172 | 0.917863 | 0.846022 |
| 0.793109 | 0.915207 | 0.855948 |
| 0.791101 | 0.921844 | 0.875193 |
| 0.789089 | 0.916425 | 0.879364 |
| 0.795216 | 0.923346 | 0.890617 |
| 0.801199 | 0.925819 | 0.899735 |
| 0.798862 | 0.911552 | 0.903845 |
| 0.804803 | 0.927504 | 0.907618 |
| 0.807047 | 0.92183  | 0.913526 |

|          |          |          |
|----------|----------|----------|
| 0.80922  | 0.918956 | 0.909263 |
| 0.814325 | 0.92226  | 0.916401 |
| 0.811397 | 0.924961 | 0.918266 |
| 0.821254 | 0.925803 | 0.920232 |
| 0.828484 | 0.920333 | 0.915669 |
| 0.836604 | 0.907979 | 0.910695 |
| 0.836477 | 0.917195 | 0.91398  |
| 0.844134 | 0.923033 | 0.918145 |
| 0.854481 | 0.920963 | 0.905159 |
| 0.857017 | 0.918532 | 0.911682 |
| 0.855437 | 0.913952 | 0.913368 |
| 0.8642   | 0.911153 | 0.9171   |
| 0.867066 | 0.90779  | 0.906341 |
| 0.654462 | 0.908589 | 0.921543 |
| 0.653622 | 0.904508 | 0.916281 |
| 0.64208  | 0.901742 | 0.911992 |
| 0.626895 | 0.904717 | 0.911127 |
| 0.616483 | 0.912903 | 0.909778 |
| 0.614691 | 0.907282 | 0.920253 |
| 0.61288  | 0.907676 | 0.892282 |
| 0.609682 | 0.906631 | 0.916437 |
| 0.600692 | 0.914991 | 0.9128   |
| 0.585967 | 0.921771 | 0.911747 |
| 0.585796 | 0.918529 | 0.906263 |
| 0.580572 | 0.925436 | 0.918353 |
| 0.907172 | 0.915205 | 0.912814 |
| 0.827224 | 0.921006 | 0.925261 |
| 0.787128 | 0.91483  | 0.917343 |
| 0.764571 | 0.924172 | 0.928061 |
| 0.715592 | 0.927016 | 0.927211 |
| 0.692423 | 0.921821 | 0.922767 |
| 0.696181 | 0.918784 | 0.932257 |
| 0.668986 | 0.916757 | 0.930955 |
| 0.671389 | 0.916149 | 0.90744  |
| 0.66329  | 0.92806  | 0.913136 |
| 0.66656  | 0.915342 | 0.907931 |
| 0.643526 | 0.901129 | 0.917509 |
| 0.646272 | 0.899132 | 0.91235  |
| 0.642944 | 0.888316 | 0.917366 |
| 0.64782  | 0.873677 | 0.917946 |
| 0.652068 | 0.860736 | 0.919463 |
| 0.644478 | 0.855476 | 0.913545 |
| 0.639747 | 0.850564 | 0.91303  |
| 0.90552  | 0.885823 | 0.915663 |
| 0.916394 | 0.880915 | 0.921594 |
| 0.91412  | 0.884956 | 0.919495 |
| 0.915984 | 0.885757 | 0.911413 |
| 0.91131  | 0.881377 | 0.91903  |

|          |          |          |
|----------|----------|----------|
| 0.912416 | 0.88918  | 0.917045 |
| 0.914063 | 0.885419 | 0.917514 |
| 0.912413 | 0.878062 | 0.915637 |
| 0.909151 | 0.867791 | 0.917079 |
| 0.908122 | 0.880078 | 0.913145 |
| 0.913523 | 0.881771 | 0.921106 |
| 0.910031 | 0.880829 | 0.918812 |
| 0.918272 | 0.881748 | 0.914873 |
| 0.919381 | 0.88113  | 0.918206 |
| 0.919936 | 0.867817 | 0.915309 |
| 0.918827 | 0.878196 | 0.921119 |
| 0.915706 | 0.870965 | 0.915764 |
| 0.913433 | 0.860645 | 0.918482 |
| 0.910592 | 0.855469 | 0.911551 |
| 0.909686 | 0.851075 | 0.916596 |
| 0.91455  | 0.839659 | 0.917335 |
| 0.913308 | 0.817824 | 0.919994 |
| 0.906318 | 0.781493 | 0.920886 |
| 0.908382 | 0.791345 | 0.915241 |
| 0.909303 | 0.788393 | 0.921519 |
| 0.907059 | 0.774455 | 0.928469 |
| 0.908453 | 0.750948 | 0.918625 |
| 0.916077 | 0.764583 | 0.918894 |
| 0.918359 | 0.738815 | 0.920431 |
| 0.907559 | 0.688032 | 0.915324 |
| 0.754965 | 0.710816 | 0.918029 |
| 0.748996 | 0.69051  | 0.912915 |
| 0.748467 | 0.681945 | 0.919044 |
| 0.755038 | 0.670621 | 0.909119 |
| 0.752043 | 0.666367 | 0.910411 |
| 0.746976 | 0.656975 | 0.920171 |
| 0.743075 | 0.64467  | 0.915744 |
| 0.745594 | 0.60953  | 0.910144 |
| 0.752    | 0.600355 | 0.921657 |
| 0.750514 | 0.572032 | 0.909739 |
| 0.756485 | 0.769077 | 0.915258 |
| 0.758275 | 0.784349 | 0.912558 |
| 0.76705  | 0.809703 | 0.923218 |
| 0.762365 | 0.867542 | 0.922264 |
| 0.782528 | 0.864482 | 0.919763 |
| 0.787829 | 0.876934 | 0.914578 |
| 0.798436 | 0.873743 | 0.912983 |
| 0.802201 | 0.875487 | 0.918232 |
| 0.804368 | 0.879306 | 0.920659 |
| 0.824118 | 0.875666 | 0.923911 |
| 0.833358 | 0.872035 | 0.916921 |
| 0.849193 | 0.88137  | 0.912352 |
| 0.854402 | 0.890041 | 0.919963 |

|          |          |          |
|----------|----------|----------|
| 0.86351  | 0.889745 | 0.913815 |
| 0.86337  | 0.884731 | 0.91546  |
| 0.876931 | 0.90287  | 0.91396  |
| 0.87743  | 0.885712 | 0.908911 |
| 0.869372 | 0.892892 | 0.907325 |
| 0.878142 | 0.898754 | 0.908454 |
| 0.878634 | 0.809216 | 0.910255 |
| 0.781716 | 0.907306 | 0.903854 |
| 0.784588 | 0.913972 | 0.91095  |
| 0.785141 | 0.918344 | 0.909755 |
| 0.778324 | 0.909263 | 0.900517 |
| 0.776856 | 0.907186 | 0.913796 |
| 0.774547 | 0.913926 | 0.910168 |
| 0.773595 | 0.911862 | 0.913226 |
| 0.775856 | 0.914156 | 0.913307 |
| 0.767243 | 0.908456 | 0.912443 |
| 0.767869 | 0.899227 | 0.906822 |
| 0.754063 | 0.893987 | 0.912416 |
| 0.748064 | 0.901591 | 0.920777 |
| 0.721371 | 0.896408 | 0.918307 |
| 0.720608 | 0.887079 | 0.919724 |
| 0.712073 | 0.886196 | 0.913051 |
| 0.709495 | 0.880247 | 0.919464 |
| 0.709574 | 0.877472 | 0.914151 |
| 0.704881 | 0.867494 | 0.914146 |
| 0.704272 | 0.868056 | 0.912638 |
| 0.708512 | 0.867087 | 0.909397 |
| 0.696375 | 0.870643 | 0.9073   |
| 0.699319 | 0.862092 | 0.907168 |
| 0.692901 | 0.865149 | 0.906976 |
| 0.690342 | 0.867415 | 0.907989 |
| 0.687593 | 0.863419 | 0.910058 |
| 0.688266 | 0.873358 | 0.905773 |
| 0.672245 | 0.873016 | 0.90162  |
| 0.670955 | 0.883345 | 0.895496 |
| 0.694725 | 0.889466 | 0.900348 |
| 0.78471  | 0.886998 | 0.902215 |
| 0.807151 | 0.873728 | 0.898303 |
| 0.809585 | 0.882187 | 0.900606 |
| 0.808391 | 0.881019 | 0.898647 |
| 0.804633 | 0.889406 | 0.898602 |
| 0.803843 | 0.882921 | 0.890227 |
| 0.798575 | 0.878632 | 0.893332 |
| 0.799031 | 0.880962 | 0.898033 |
| 0.798082 | 0.8868   | 0.889424 |
| 0.803204 | 0.89921  | 0.888812 |
| 0.801734 | 0.907057 | 0.898057 |
| 0.841025 | 0.898822 | 0.890152 |

|          |          |          |
|----------|----------|----------|
| 0.835415 | 0.902822 | 0.889154 |
| 0.835047 | 0.908584 | 0.893416 |
| 0.830061 | 0.907585 | 0.892735 |
| 0.822703 | 0.911124 | 0.898375 |
| 0.822276 | 0.905084 | 0.874234 |
| 0.824235 | 0.910863 | 0.895638 |
| 0.830061 | 0.91071  | 0.876616 |
| 0.828467 | 0.914043 | 0.90157  |
| 0.831958 | 0.913484 | 0.892147 |
| 0.832923 | 0.915418 | 0.898472 |
| 0.833636 | 0.912178 | 0.895536 |
| 0.832391 | 0.915127 | 0.893828 |
| 0.842799 | 0.91557  | 0.899906 |
| 0.8439   | 0.906596 | 0.897408 |
| 0.843639 | 0.919191 | 0.903839 |
| 0.846282 | 0.920415 | 0.899668 |
| 0.840145 | 0.912451 | 0.894958 |
| 0.817159 | 0.917972 | 0.897386 |
| 0.79611  | 0.920807 | 0.90145  |
| 0.75051  | 0.92108  | 0.898174 |
| 0.745904 | 0.924652 | 0.899981 |
| 0.737298 | 0.91999  | 0.896428 |
| 0.71945  | 0.9146   | 0.907672 |
| 0.713077 | 0.922693 | 0.894471 |
| 0.715455 | 0.923096 | 0.906318 |
| 0.710299 | 0.923308 | 0.905027 |
| 0.725189 | 0.925399 | 0.919399 |
| 0.736523 | 0.921096 | 0.922683 |
| 0.749399 | 0.914879 | 0.916765 |
| 0.765906 | 0.912182 | 0.920073 |
| 0.761171 | 0.915693 | 0.917029 |
| 0.755921 | 0.91251  | 0.914657 |
| 0.764178 | 0.909758 | 0.921156 |
| 0.758355 | 0.895373 | 0.916474 |
| 0.767639 | 0.895081 | 0.911147 |
| 0.775007 | 0.892971 | 0.910384 |
| 0.781571 | 0.886616 | 0.917322 |
| 0.785446 | 0.875545 | 0.917777 |
| 0.804023 | 0.858909 | 0.918903 |
| 0.860147 |          | 0.924338 |
| 0.858788 |          | 0.916841 |
| 0.850774 |          | 0.918048 |
| 0.850836 |          | 0.92721  |
| 0.849158 |          | 0.92327  |
| 0.848175 |          | 0.924028 |
| 0.842227 |          | 0.917968 |
| 0.838231 |          | 0.930097 |
| 0.831372 |          | 0.92405  |

|          |          |
|----------|----------|
| 0.830795 | 0.909339 |
| 0.831346 | 0.918023 |
| 0.830243 | 0.921112 |
| 0.827762 | 0.926083 |
| 0.818438 | 0.919314 |
| 0.818715 | 0.918023 |
| 0.818114 | 0.910733 |
| 0.812092 | 0.906651 |
| 0.812766 | 0.914877 |
| 0.813845 | 0.912004 |
| 0.814347 | 0.927642 |
| 0.81637  | 0.922988 |
| 0.819839 | 0.918    |
| 0.815372 | 0.92487  |
| 0.821621 | 0.933287 |
| 0.836176 | 0.923058 |
| 0.836898 | 0.915682 |
| 0.841042 | 0.918784 |
| 0.857307 | 0.922752 |
| 0.878394 | 0.921737 |
| 0.879491 | 0.912452 |
| 0.89259  | 0.925462 |
| 0.903619 | 0.923986 |
| 0.903668 | 0.931123 |
| 0.909864 | 0.921169 |
| 0.912011 | 0.92498  |
| 0.916811 | 0.92763  |
| 0.907476 | 0.933292 |
| 0.917287 | 0.929995 |
| 0.90489  | 0.91749  |
| 0.907723 | 0.933943 |
|          | 0.851631 |
|          | 0.849975 |
|          | 0.85961  |
|          | 0.85655  |
|          | 0.858361 |
|          | 0.854384 |
|          | 0.86466  |
|          | 0.861706 |
|          | 0.868092 |
|          | 0.877397 |
|          | 0.876988 |
|          | 0.878135 |
|          | 0.885779 |
|          | 0.88861  |
|          | 0.894899 |
|          | 0.872851 |
|          | 0.875925 |

0.886514  
0.887966  
0.87928  
0.872733  
0.85339  
0.845709  
0.832011  
0.811633  
0.800816  
0.797525  
0.770918  
0.76872  
0.757035  
0.744033  
0.742272  
0.733082  
0.724443  
0.715885  
0.721128  
0.706472  
0.705598  
0.716124  
0.671551  
0.83669  
0.862487  
0.858489  
0.865267  
0.883191  
0.886911  
0.899057  
0.89353  
0.898608  
0.907186  
0.913913  
0.909783  
0.911255  
0.919007  
0.915399  
0.920332  
0.912482  
0.920164  
0.912618  
0.912639  
0.9174  
0.917249  
0.923015  
0.911152  
0.920675

0.917859  
0.916656  
0.919563  
0.915252  
0.921738  
0.922224  
0.919663  
0.913546  
0.928522  
0.91577  
0.917156  
0.908487  
0.921436  
0.925975  
0.914782  
0.899945  
0.902674  
0.896129  
0.898438  
0.902023  
0.904284  
0.905664  
0.910119  
0.898618  
0.901609  
0.912105  
0.914598  
0.918243  
0.915792  
0.917101  
0.918576  
0.916788  
0.917948  
0.917819  
0.912239  
0.91228  
0.91702  
0.909306  
0.904794  
0.90843  
0.903904  
0.895693  
0.902058  
0.89171  
0.888173  
0.871398  
0.871798  
0.86909



0.867405  
0.865249  
0.862833  
0.868336  
0.868985  
0.873889  
0.881928  
0.879099  
0.875009  
0.8752  
0.87052  
0.873275  
0.870773  
0.870151  
0.861659  
0.861378  
0.854103  
0.847681  
0.843909  
0.835195  
0.826686  
0.814592  
0.813659  
0.804743  
0.792391  
0.782257  
0.784443  
0.771195  
0.774614  
0.773292  
0.765132  
0.777773  
0.779645  
0.775745  
0.782592  
0.780588  
0.766467  
0.770512  
0.77829  
0.782707  
0.782455  
0.80072  
0.80684  
0.828716  
0.837135  
0.867346  
0.875992

| Hours | CloneR   |          |    | Y-27632  |          |    | CEPT     |          |  |
|-------|----------|----------|----|----------|----------|----|----------|----------|--|
|       | Mean     | SEM      | N  | Mean     | SEM      | N  | Mean     | SEM      |  |
| 0     | 0        | 0        | 16 | 0        | 0        | 16 | 0        | 0        |  |
| 1     | -0.41179 | 0.660641 | 16 | 8.582799 | 0.602431 | 16 | 8.183278 | 0.601721 |  |
| 2     | 0.971528 | 0.669052 | 16 | 10.40721 | 0.606996 | 16 | 10.14766 | 0.603633 |  |
| 3     | 2.305816 | 0.711574 | 16 | 11.75605 | 0.600589 | 16 | 11.76938 | 0.56631  |  |
| 4     | 3.3624   | 0.781561 | 16 | 12.85852 | 0.612161 | 16 | 13.14561 | 0.532168 |  |
| 5     | 4.12151  | 0.836733 | 16 | 13.67786 | 0.609484 | 16 | 14.17346 | 0.519442 |  |
| 6     | 4.690696 | 0.869582 | 16 | 14.27448 | 0.590555 | 16 | 14.77963 | 0.553683 |  |
| 7     | 5.284134 | 0.927701 | 16 | 14.81628 | 0.593618 | 16 | 15.39007 | 0.543176 |  |
| 8     | 5.978555 | 0.968224 | 16 | 15.24403 | 0.58984  | 16 | 15.96512 | 0.552412 |  |
| 9     | 6.629844 | 1.025339 | 16 | 15.80489 | 0.552254 | 16 | 16.71019 | 0.575414 |  |
| 10    | 7.275885 | 1.06593  | 16 | 16.46231 | 0.542633 | 16 | 17.51731 | 0.622371 |  |
| 11    | 7.748787 | 1.079834 | 16 | 17.16479 | 0.535976 | 16 | 18.2571  | 0.672883 |  |
| 12    | 8.32964  | 1.140802 | 16 | 17.7959  | 0.543806 | 16 | 19.15956 | 0.719031 |  |
| 13    | 8.674804 | 1.190452 | 16 | 18.4097  | 0.551724 | 16 | 20.08832 | 0.78225  |  |
| 14    | 9.078985 | 1.235258 | 16 | 18.93644 | 0.540733 | 16 | 20.80438 | 0.814986 |  |
| 15    | 9.26928  | 1.297121 | 16 | 19.35879 | 0.532323 | 16 | 21.48673 | 0.823493 |  |
| 16    | 9.582039 | 1.314439 | 16 | 19.84555 | 0.572806 | 16 | 22.05457 | 0.818975 |  |
| 17    | 9.896125 | 1.346201 | 16 | 20.3133  | 0.580159 | 16 | 22.77089 | 0.829499 |  |
| 18    | 10.25403 | 1.404375 | 16 | 20.64136 | 0.606242 | 16 | 23.50921 | 0.865946 |  |
| 19    | 10.36903 | 1.416812 | 16 | 21.08474 | 0.656471 | 16 | 24.09743 | 0.896224 |  |
| 20    | 10.38161 | 1.456401 | 16 | 21.45121 | 0.679996 | 16 | 24.65914 | 0.940849 |  |
| 21    | 10.35718 | 1.474678 | 16 | 21.59424 | 0.709103 | 16 | 25.0755  | 0.994665 |  |
| 22    | 10.45147 | 1.527798 | 16 | 21.63185 | 0.713577 | 16 | 25.65437 | 1.061035 |  |
| 23    | 10.68171 | 1.637828 | 16 | 21.745   | 0.731873 | 16 | 26.25586 | 1.135528 |  |
| 24    | 10.73744 | 1.659167 | 16 | 21.89913 | 0.753174 | 16 | 26.92431 | 1.245918 |  |
| 25    | 10.72105 | 1.700543 | 16 | 21.75297 | 0.755831 | 16 | 27.53943 | 1.314346 |  |
| 26    | 10.80139 | 1.77091  | 16 | 21.86568 | 0.761697 | 16 | 28.28581 | 1.398856 |  |
| 27    | 10.91238 | 1.820204 | 16 | 22.11459 | 0.774976 | 16 | 28.97642 | 1.450975 |  |
| 28    | 10.89149 | 1.895922 | 16 | 22.33728 | 0.790322 | 16 | 29.73092 | 1.54354  |  |
| 29    | 10.92809 | 1.967275 | 16 | 22.55105 | 0.831317 | 16 | 30.30196 | 1.64604  |  |
| 30    | 10.91744 | 2.021783 | 16 | 22.85295 | 0.921069 | 16 | 30.8852  | 1.725814 |  |
| 31    | 10.98352 | 2.081162 | 16 | 23.1923  | 0.934911 | 16 | 31.47112 | 1.850198 |  |
| 32    | 11.0601  | 2.128364 | 16 | 23.36666 | 0.959676 | 16 | 32.03774 | 1.982496 |  |
| 33    | 11.12207 | 2.167877 | 16 | 23.58361 | 0.974752 | 16 | 32.50263 | 2.13267  |  |
| 34    | 11.11372 | 2.205827 | 16 | 23.61325 | 0.974476 | 16 | 32.92903 | 2.206713 |  |
| 35    | 11.2225  | 2.22353  | 16 | 23.68486 | 0.990267 | 16 | 33.50284 | 2.343869 |  |
| 36    | 11.21739 | 2.250744 | 16 | 23.67595 | 1.019611 | 16 | 33.8791  | 2.411259 |  |
| 37    | 11.13411 | 2.272976 | 16 | 23.66363 | 1.063218 | 16 | 34.11335 | 2.467907 |  |
| 38    | 11.13434 | 2.300432 | 16 | 23.58685 | 1.090231 | 16 | 34.29954 | 2.553884 |  |
| 39    | 11.17848 | 2.354231 | 16 | 23.56801 | 1.123378 | 16 | 34.70698 | 2.640332 |  |
| 40    | 11.11956 | 2.391024 | 16 | 23.56188 | 1.138397 | 16 | 35.11472 | 2.751759 |  |
| 41    | 11.18949 | 2.502336 | 16 | 23.56264 | 1.176274 | 16 | 35.42446 | 2.776491 |  |
| 42    | 11.25561 | 2.54124  | 16 | 23.54315 | 1.235613 | 16 | 35.66693 | 2.794373 |  |
| 43    | 11.15584 | 2.555355 | 16 | 23.5984  | 1.230838 | 16 | 35.87137 | 2.840184 |  |
| 44    | 11.01455 | 2.561009 | 16 | 23.56675 | 1.256211 | 16 | 35.97666 | 2.923641 |  |
| 45    | 10.9686  | 2.576936 | 16 | 23.60009 | 1.33762  | 16 | 36.37381 | 2.959823 |  |

46 10.74068 2.599884  
47 10.49901 2.631078  
48 10.23599 2.735175

16 23.59448 1.408318  
16 23.60186 1.438894  
16 23.88567 1.45691

16 36.76577 3.022153  
16 37.25715 3.084891  
16 37.75893 3.159256



16  
16  
16
