# Supplementary material
Source: PubMed Central journal article supplement (PMC11009857)
Supplement: NIHMS1962556-supplement-SD_Fig3.pdf [file NIHMS1962556-supplement-SD_Fig3.pdf]

| BD FACSAria |      | Cytena SCP |      |
|-------------|------|------------|------|
| Y-27632     | CEPT | Y-27632    | CEPT |
| 7           | 30   | 34         | 69   |
| 4           | 31   | 40         | 64   |
| 6           | 38   | 38         | 62   |

| Y-27632 | CloneR | CEPT |
|---------|--------|------|
| 14      | 31     | 43   |
| 17      | 38     | 55   |
| 21      | 42     | 54   |

| Hours | WA09 SC#5 |          |          | WA09 SC#8 |          |          | WA09 Bulk |          |  |
|-------|-----------|----------|----------|-----------|----------|----------|-----------|----------|--|
| 0     | 4.709814  | 4.260305 | 4.605841 | 5.480927  | 4.944488 | 5.27074  | 2.056718  | 2.226422 |  |
| 6     | 8.348572  | 8.242269 | 8.310576 | 9.144347  | 8.821231 | 8.936579 | 4.277241  | 5.117358 |  |
| 12    | 12.31888  | 12.61634 | 12.61122 | 12.84538  | 11.98077 | 12.17554 | 7.52968   | 8.131342 |  |
| 18    | 16.5435   | 16.55754 | 16.65281 | 16.47436  | 15.92823 | 16.08724 | 11.1333   | 11.9911  |  |
| 24    | 18.3325   | 18.39538 | 18.30092 | 18.6579   | 17.93237 | 18.49868 | 13.6159   | 14.58021 |  |
| 30    | 21.33666  | 21.13515 | 20.9758  | 22.00205  | 21.35039 | 21.90733 | 16.76452  | 17.64676 |  |
| 36    | 25.10672  | 24.99656 | 24.87341 | 26.2562   | 25.3177  | 25.90526 | 20.27704  | 21.17428 |  |
| 48    | 36.17023  | 35.70221 | 35.98644 | 39.73925  | 38.29219 | 38.90403 | 35.84628  | 36.20029 |  |
| 54    | 41.06573  | 40.76423 | 41.10231 | 44.79512  | 42.85542 | 43.87293 | 42.39537  | 43.40153 |  |
| 60    | 47.11035  | 47.05972 | 47.20758 | 51.52074  | 49.56951 | 50.36781 | 52.07087  | 53.62452 |  |
| 66    | 56.29441  | 56.59802 | 56.43599 | 59.44809  | 57.42928 | 58.61736 | 63.71003  | 65.70519 |  |
| 72    | 64.29869  | 67.00002 | 67.41627 | 69.15668  | 67.15015 | 68.5129  | 68.67142  | 69.9966  |  |
| 78    | 72.79785  | 72.21613 | 72.84936 | 75.32872  | 73.68244 | 71.08488 | 78.70214  | 81.39972 |  |
| 84    | 83.71175  | 82.73771 | 83.19508 | 84.0612   | 82.84734 | 82.53941 | 91.42879  | 93.3548  |  |
| 90    | 95.14445  | 94.12837 | 94.55123 | 94.16837  | 93.71355 | 92.53025 | 94.05133  | 95.33203 |  |
| 96    | 97.66055  | 96.74498 | 97.06088 | 97.6492   | 96.9176  | 96.32548 | 97.45798  | 98.48605 |  |
| 102   | 99.49682  | 99.09347 | 99.06942 | 99.22946  | 98.88504 | 98.2932  | 99.07267  | 99.46946 |  |

WA09 SC#1

|          |          |          |          |
|----------|----------|----------|----------|
| 2.14268  | 1.969604 | 1.85418  | 1.658833 |
| 4.400963 | 3.664525 | 3.738851 | 3.375786 |
| 7.797083 | 7.2842   | 7.133831 | 6.533877 |
| 11.19495 | 12.15962 | 12.37744 | 11.26646 |
| 13.81412 | 15.30165 | 15.14355 | 14.37555 |
| 16.75647 | 19.29789 | 18.92061 | 17.97751 |
| 20.30325 | 23.84382 | 23.49175 | 22.03133 |
| 35.39512 | 41.12787 | 42.58315 | 39.99538 |
| 41.9351  | 49.36606 | 50.17825 | 47.1666  |
| 51.29034 | 59.9707  | 61.34117 | 57.56872 |
| 63.72278 | 72.66673 | 72.61485 | 69.65199 |
| 68.40156 | 78.72561 | 79.09942 | 76.12569 |
| 78.88295 | 89.486   | 90.33486 | 87.95403 |
| 91.47919 | 97.54137 | 97.55045 | 96.79118 |
| 93.50312 | 98.96927 | 99.03337 | 98.43985 |
| 96.53661 | 99.82972 | 99.88489 | 99.74154 |
| 98.41822 | 99.99063 | 99.96794 | 99.97217 |

| WA09 Bulk (DMSO) | WA09 Bulk (Y-27632) | WA09 Bulk (CEPT) | WA09 SC#1 (DMSO) |
|------------------|---------------------|------------------|------------------|
| 136.09           | 2806.74             | 4979.23          | 185.055          |
| 136.19           | 2998.06             | 5121.51          | 169.3767         |
| 125.83           | 3096.9              | 4889.1           | 155.7511         |
| 143.64           | 2401.93             | 5221.12          | 170.5171         |
| 135.08           | 3209.91             | 4545.43          | 182.8941         |
| 126.37           | 3120.41             | 4316.21          | 164.2626         |

| WA09 SC#1 (Y-27632) | WA09 SC#1 (CEPT) | WA09 SC#5(DMSO) | WA09 SC#5 (Y-27632) |
|---------------------|------------------|-----------------|---------------------|
| 3388.128            | 5703.838         | 130.43          | 3554.74             |
| 3528.937            | 4978.145         | 166.48          | 3656.61             |
| 3255.525            | 5418.216         | 133.79          | 3915.69             |
| 3864.604            | 5393.557         | 116.71          | 3488.46             |
| 3550.162            | 4910.232         | 120.8           | 3555.5              |
| 3648.901            | 4980.223         | 119.48          | 3664.48             |

| WA09 SC#5 (CEPT) | WA09 SC#8 (DMSO) | WA09 SC#8 (Y-27632) | WA09 SC#8 (CEPT) |
|------------------|------------------|---------------------|------------------|
| 5191.82          | 257.23           | 4030.47             | 5498.87          |
| 4985.56          | 246              | 4080.87             | 5706.75          |
| 5458.53          | 249.9            | 4075.04             | 5998.93          |
| 4968.09          | 219.54           | 4236.43             | 5484.82          |
| 5029.8           | 235.91           | 3873.7              | 5504.73          |
| 5206.09          | 284.1            | 3942.83             | 6046.04          |
