# Supplementary material
Source: PubMed Central journal article supplement (PMC11009857)

OCT4

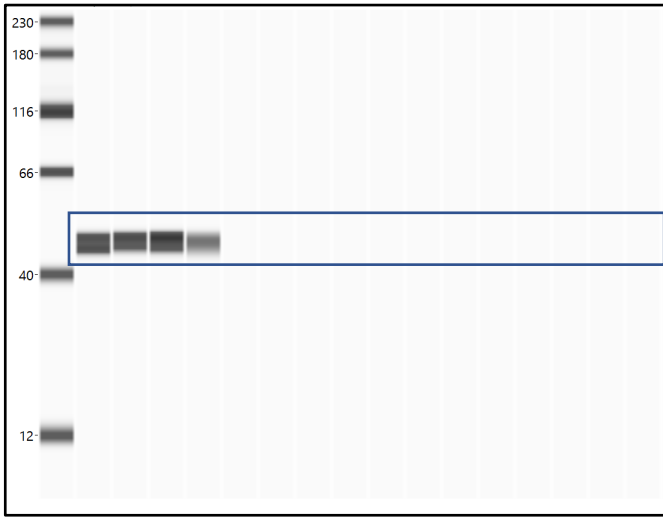

Brachyury

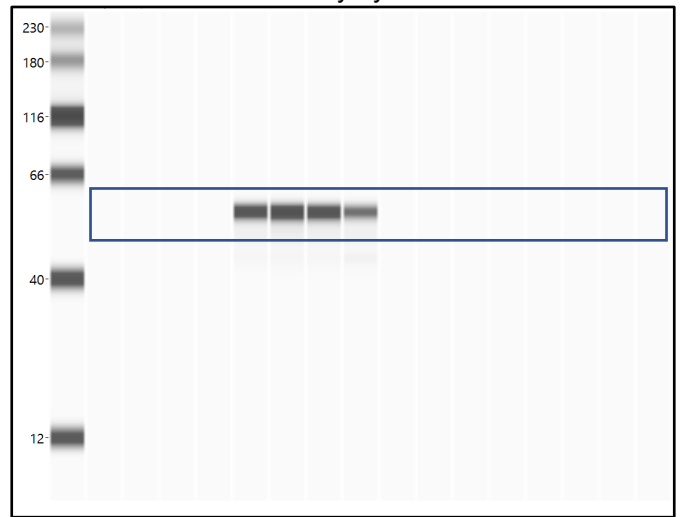

SOX17

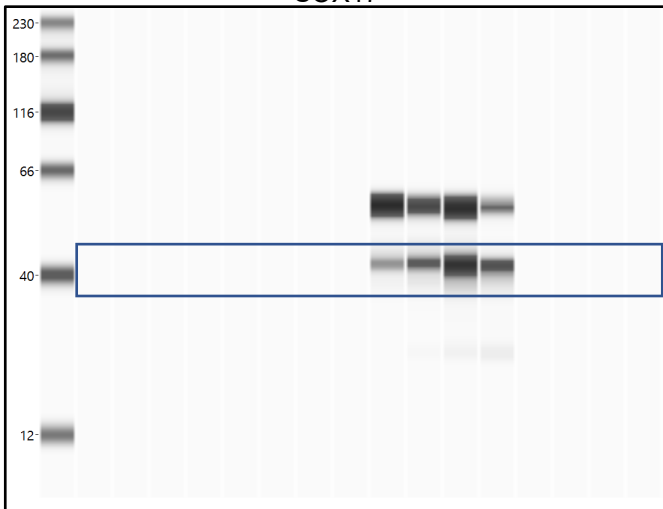

PAX6

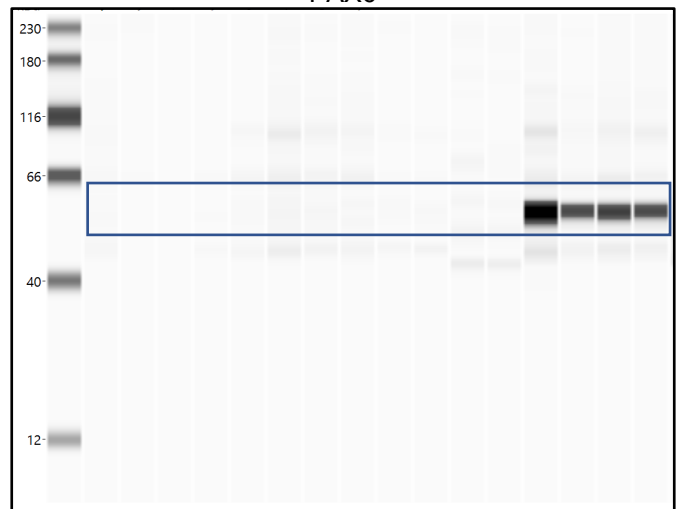

$\beta$ -Tubulin

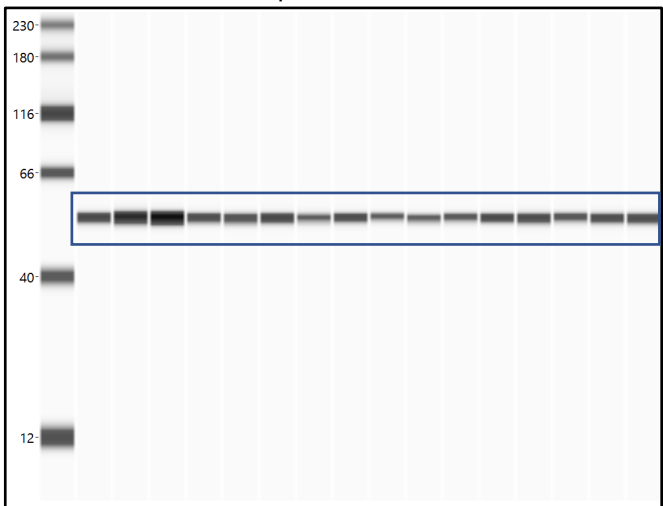

Supplement: NIHMS1962556-supplement-SD_Fig6.pdf [file NIHMS1962556-supplement-SD_Fig6.pdf]
